# Supplementary material
Source: PubMed Central journal article supplement (PMC1400554)
Supplement: plntphys_pp.105.072660_1.pdf [file plntphys_pp.105.072660_1.pdf]

## Supplemental Data

```

FBP7  AGCATGATGCCTGCTGGTGGGCAGGAGTACAATGCAATTCAGCAATATTTGCAAGAAAC 600
      |||||
FBP11  AGCATGATGCCAGCTACTGGGCAAGAGTACAATGCATTTTCAGCAATATTTTGCAAGAAAC 600

FBP7  ATGCTTCAACTTAATATGATGGAAGGGG---TGCCTTCTAT---CCATTGCCCTCT--- 651
      |||||
FBP11  ATGCTTCAACTCAATATGATGGAAGGAGGTGTGCCTTCTTATGATCCATTGCCCTGCTCAT 660

FBP7  GACAAGAAGTCCCTCGACCTTGAGTAAACATGCTTCCCAAGTAAGTCCTCACATCGATGT 711
      |||||
FBP11  GACAAGAAGTCTCTCCAGCTTGAGTGAACATCTTTTGGCTTGAATCCAAGTAAATTTAT 720

FBP7  GACAAATATATTAAGAAATTTGGTGTGAACTTATGAAGTTGGAGTAATCTCTAATGAT 771
      |||||
FBP11  TGGGCGCTGGAGAAAGAAATCTGCTCTTAGAAGT---TAATATAACAATCTTCAGTTTT 777

FBP7  TGTG-TGTTCTTAAATTACTACCTACTTTGGTATATTTGAATTGTTTGCCAATATTTTA 830
      |||||
FBP11  TGTGCTTTTGCTTTAAGTACT---TTTTCTGGTGTTTTGAATTGATTTC--TATTATT 832

FBP7  GGATCGACTTGTAAGAATTTGAACTGGTGTGTTTCAAGCTTTCTTGCAATAAACTTTG 890
      |
FBP11  --A---CTTGTAATTTGGTGAACTCGTC-----AGCTTTCTCCAATAGA-CTTTG 877

FBP7  CACACATCAAAAAAAAAAAAAA 911
      |||
FBP11  CACTTCTTTGAAAAAAAAAAAAA 898

```

**Fig. S1.** Sequence alignment of the 3'-terminal part of *FBP7* and *FBP11*.

The forward and reverse primers used for the specific amplification of *FBP7* and *FBP11* are underlined and bold. The stop codons in both sequences are indicated in bold. The sequence of the *FBP11* transgene stops at 737bp.
